# Supplementary material
Source: publisher site journal article supplement (https://www.spandidos-publications.com/6105/downloadSupplementary)

Figure S1. Result of BOILED-Egg analysis of 7,8-DHF. 7,8-DHF, 7,8-dihydroxyflavone; BBB, blood-brain barrier; HIA, human intestinal absorption; PGP+, active efflux by P-glycoprotein (P-gp); PGP-, non-substrate of P-gp.

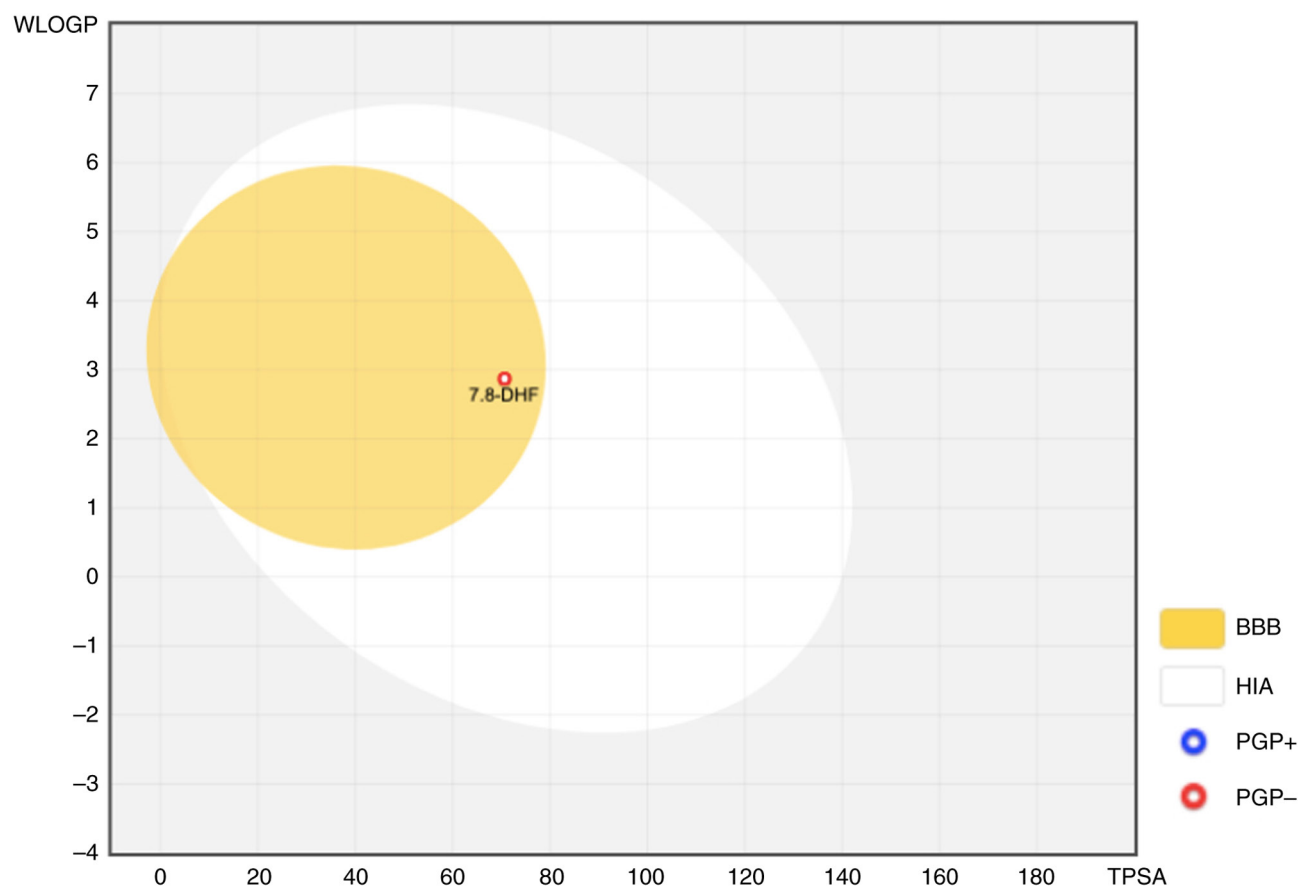

Supplement: Supplementary file 1 [file downloadSupplementary]
